# Supplementary figures and images for: Microglial pathology
Source: Springer Nature journal article supplement (doi:10.1186/s40478-014-0142-6), 2014-09-25

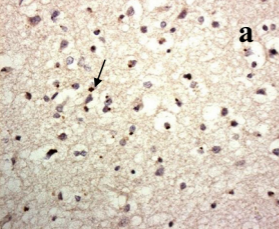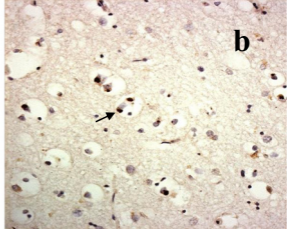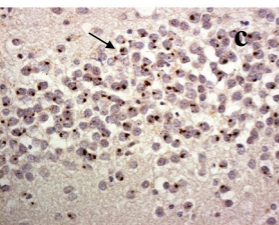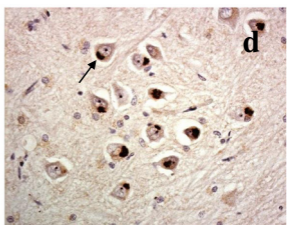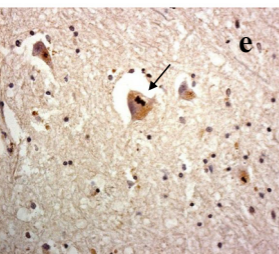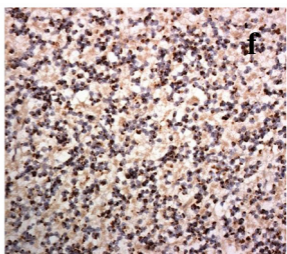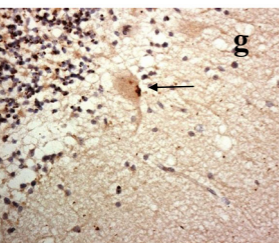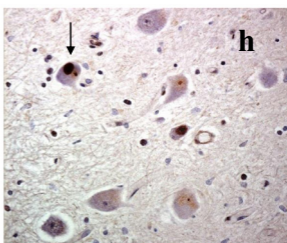

Supplement: MOESM2 [file 25658254]

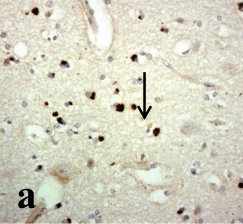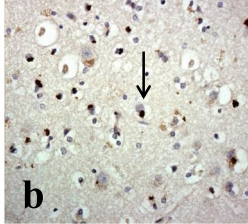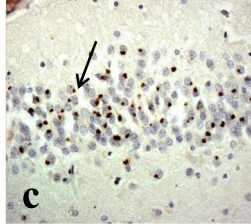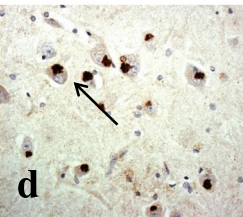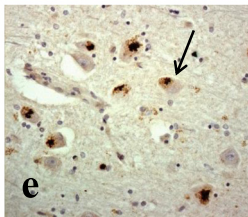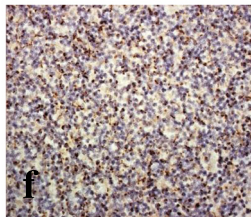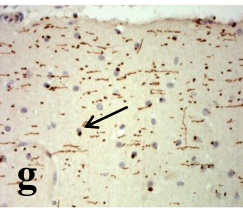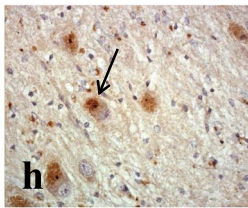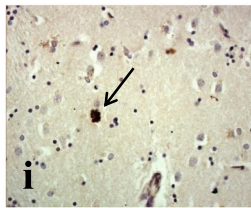

Supplement: MOESM3 [file 25658254]
